# Supplementary material for: Compound loss of muscleblind-like function in myotonic dystrophy
Source: PubMed Central journal article supplement (PMC3914532; doi:10.1002/emmm.201303275), 2013-10-08
Supplement: emmm0005-1887-sd2.pdf [file emmm0005-1887-sd2.pdf]

## Supporting Information

Lee *et al.*, Compound loss of muscleblind-like function in myotonic dystrophy

### Table of Contents:

**Supporting Information Figure S1:** Analysis of *Mbnl1*; *Mbnl2* DKO mice

**Supporting Information Figure S2:** *Mbnl2* mis-splicing in *Mbnl1*<sup>-/-</sup>; *Mbnl2*<sup>+/-</sup> muscle and heart

**Supporting Information Figure S3:** Cardiac dysfunction in *Mbnl1*<sup>-/-</sup>; *Mbnl2*<sup>+/-</sup> KO mice

**Supporting Information Table S1:** Primers for *Mbnl1* and *Mbnl2* compound knockout analysis

**Supporting Information Table S2:** HITS-CLIP analysis (Excel file)

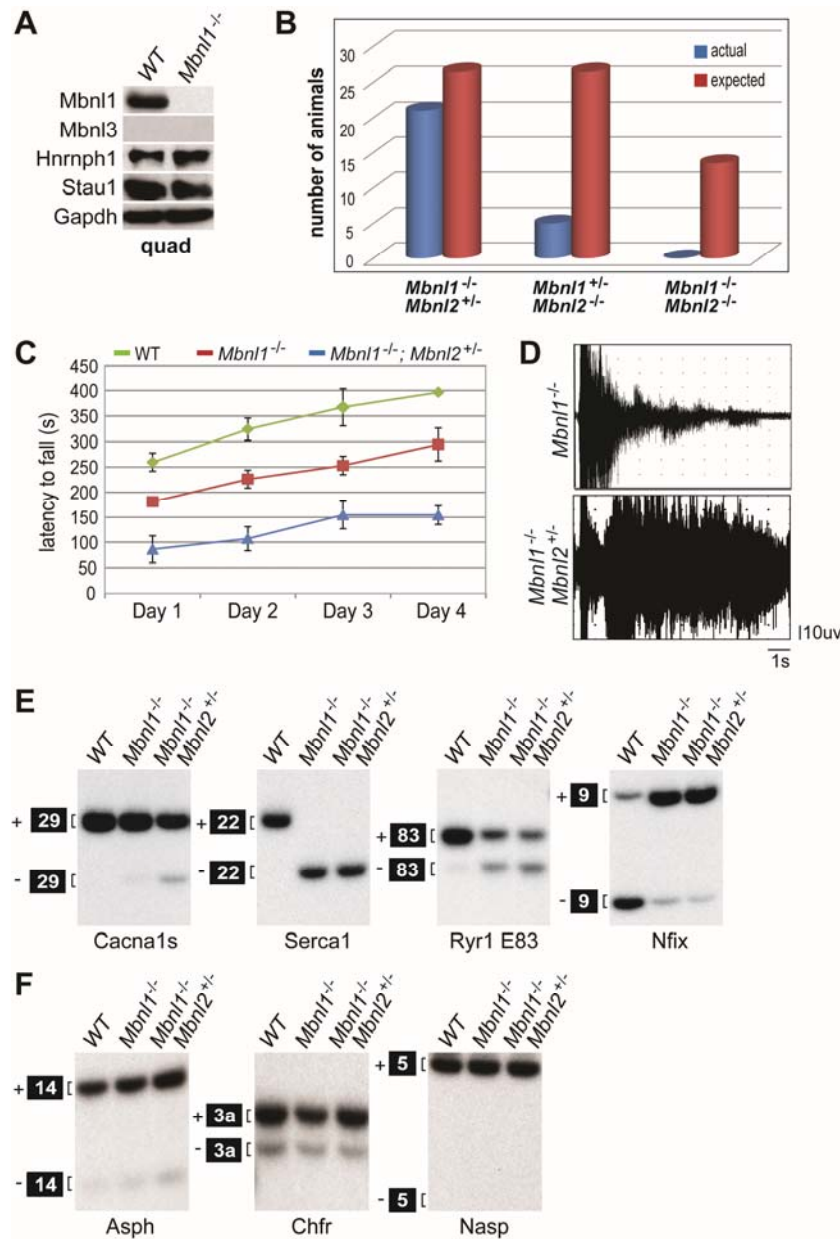

### Supporting Information Figure S1

Analysis of *Mbnl1*; *Mbnl2* DKO mice. (A) Immunoblots of WT and *Mbnl1* KO (*Mbnl1*<sup>-/-</sup>) adult quadriceps (quad) showing that major changes in Mbnl3, Hnrnp1 and Stau1 protein levels do not occur following *Mbnl1* loss. Celf1 levels are also not affected in *Mbnl1* KO (Kanadia et al, 2003). (B) *Mbnl1*<sup>+/ $\Delta$ E3</sup> X *Mbnl2*<sup>+/ $\Delta$ E2</sup> crosses resulted in nearly the expected number (red) of *Mbnl1*<sup>-/-</sup>; *Mbnl2*<sup>+/-</sup> mice (blue, actual number obtained), lower than expected numbers of *Mbnl1*<sup>+/-</sup>; *Mbnl2*<sup>-/-</sup> KO mice and no viable *Mbnl1*<sup>-/-</sup>; *Mbnl2*<sup>-/-</sup> DKO mice. (C) Rotarod analysis of *Mbnl1*<sup>+/+</sup> (WT, green), *Mbnl1*<sup>-/-</sup> KO (red) and *Mbnl1*<sup>-/-</sup>; *Mbnl2*<sup>+/-</sup> mice during the 4-day testing regimen. (D) Representative electromyography for *Mbnl1* KO (*Mbnl1*<sup>-/-</sup>) versus *Mbnl1*<sup>-/-</sup>; *Mbnl2*<sup>+/-</sup> mice. (E) RT-PCR splicing analysis of WT, *Mbnl1*<sup>-/-</sup> and *Mbnl1*<sup>-/-</sup>; *Mbnl2*<sup>+/-</sup> KO mice for *Cacna1s*, *Serca1*, *Ryr1* exon 83 and *Nfix*. (F) RT-PCR splicing analysis demonstrating that loss of Mbnl proteins does not result in a global effect on splicing regulation with no significant changes for *Asph*, *Chfr* or *Nasp*.

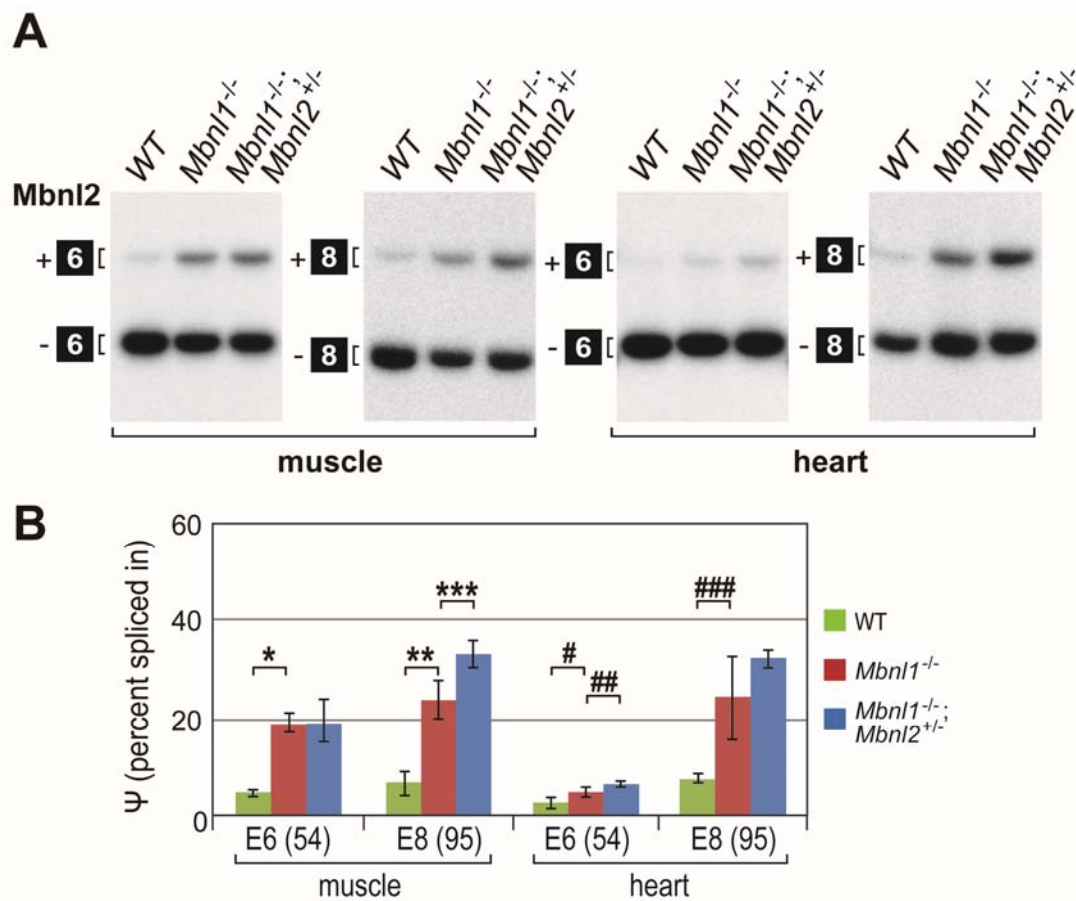

**Supporting Information Figure S2**

Mbnl2 mis-splicing in *Mbnl1*<sup>-/-</sup>; *Mbnl2*<sup>+/-</sup> muscle and heart. (A) RT-PCR splicing assay showing an increase in mis-splicing of Mbnl2 exons 6 (54 nt) and 8 (95 nt) in *Mbnl1*<sup>-/-</sup>; *Mbnl2*<sup>+/-</sup> versus WT and *Mbnl1*<sup>-/-</sup> KOs. (B) Percent spliced in values ( $\psi$ ) for Mbnl2 exons 6 and 8 in muscle and heart for WT (green), *Mbnl1*<sup>-/-</sup> (red) and *Mbnl1*<sup>-/-</sup>; *Mbnl2*<sup>+/-</sup> (blue) (n=4, \* $p$  = 0.00025, \*\* $p$  = 0.00168, \*\*\* $p$  = 0.016, # $p$  = 0.037, ## $p$  = 0.019, ### $p$  = 0.0235, Student's  $t$ -test).

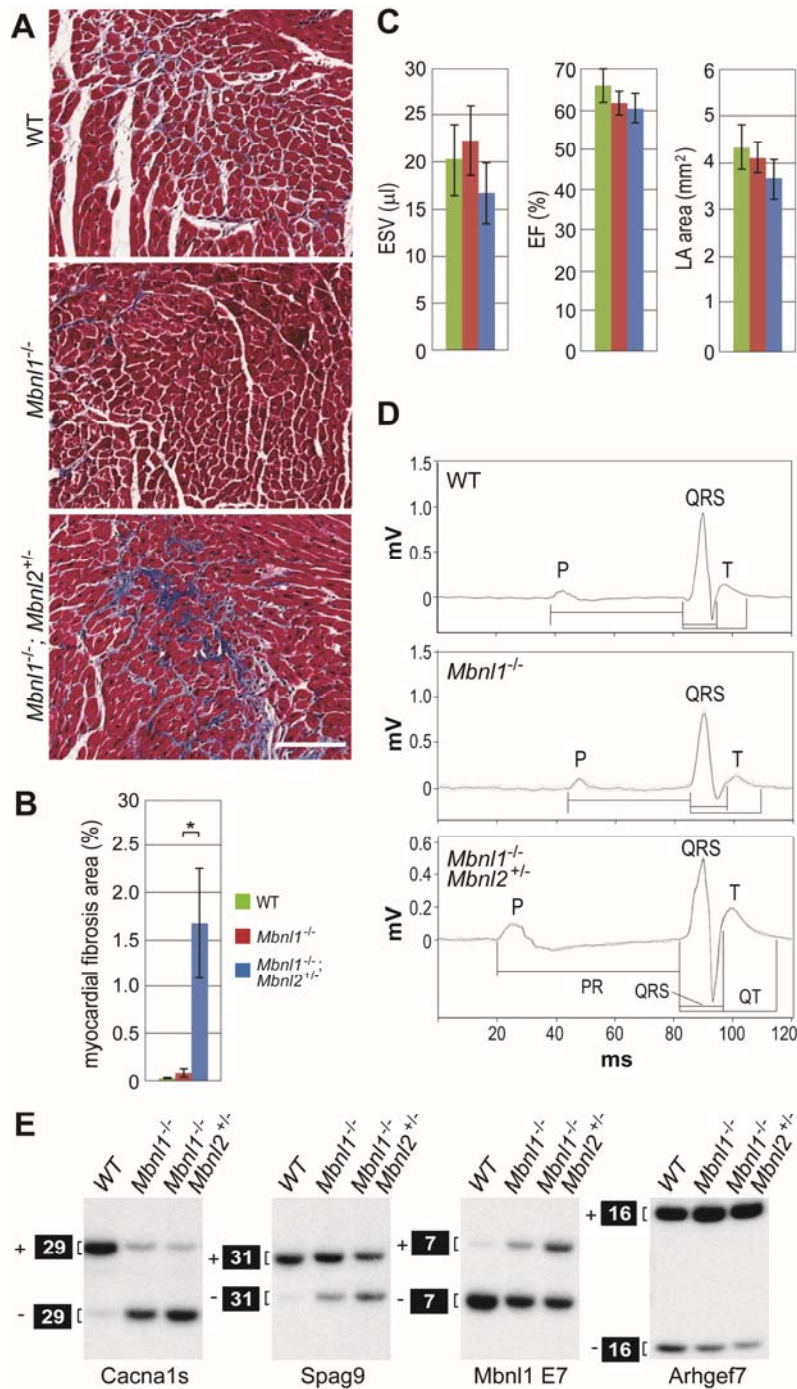

### Supporting Information Figure S3

Cardiac dysfunction in *Mbnl1*<sup>-/-</sup>; *Mbnl2*<sup>+/-</sup> KO mice. **(A)** Increased focal fibrosis (Masson's trichrome staining, blue) in left ventricular wall in *Mbnl1*<sup>-/-</sup>; *Mbnl2*<sup>+/-</sup> KO versus WT and *Mbnl1*<sup>-/-</sup> hearts (scale bar represents 100 μm). **(B)** Comparison of myocardial fibrosis total area in WT (green), *Mbnl1*<sup>-/-</sup> (red) and *Mbnl1*<sup>-/-</sup>; *Mbnl2*<sup>+/-</sup> (blue) KO. (n = 3, \*p = 0.0481, Student's *t*-test). **(C)** End systolic volume (ESV), ejection fraction (EF) and left atrial area (LA area) were not significantly different between WT (green), *Mbnl1*<sup>-/-</sup> (red) and *Mbnl1*<sup>-/-</sup>; *Mbnl2*<sup>+/-</sup> (blue) KO hearts (n=5). **(D)** ECG analysis showing prolongation of PR, QRS and QT intervals in *Mbnl1*<sup>-/-</sup>; *Mbnl2*<sup>+/-</sup> KO versus WT mice. **(E)** RT-PCR splicing analysis of WT, *Mbnl1*<sup>-/-</sup> and *Mbnl1*<sup>-/-</sup>; *Mbnl2*<sup>+/-</sup> KO mice for Cacna1s, Spag9, Mbnl1 exon 7 (54 nt) and Arhgef7.

## Supporting Information Table S1:

### Primers for *Mbn1* and *Mbn2* compound knockout analysis

| Gene    | Exon   | Exon (nt) | Forward primer (name)                         | Reverse primer (name)                         |
|---------|--------|-----------|-----------------------------------------------|-----------------------------------------------|
| Clcn1   | 7a     | 79        | ttcacatgccagcatctgtgc (MSS2788)               | cacggaacacaaaggcactgaatgt (MSS1653)           |
| Ryr1    | 70     | 15        | gcgtgaagaacagaacttcgtggtc (MSS3890)           | cttggcgttcctgatctgagc (MSS3891)               |
| Cacna1s | 29     | 57        | gagatccttggaaatgtttgacttcct (MSS4433)         | gggtcagcagcttgaccagtctcat (MSS4434)           |
| Serca1  | 22     | 41        | gctcatggtcctcaagatctcac (MSS2761)             | gggtcagtgccctcagctttg (MSS2762)               |
| Bin1    | 11     | 45        | cagaacctcaatgatgtcctgtgca (MSS4578)           | ctctggctcatggtcactctgatct (MSS4579)           |
| Ryr1    | 83     | 18        | cttcgagaggcagaacaaggcag (MSS3892)             | aacaggtcctgtgtgaactcgtcatc (MSS3893)          |
| Tnnt3   | 9      | 39        | tctgacgaggaaactgaacaag (MSS1677)              | tgtcaatgaggcgttgag (MSS1678)                  |
| Nfix    | 8      | 123       | ggagagtcctagatgatgtttctatcct (MSS4306)        | ggatgatggacgtggaaggaa (MSS4307)               |
| Tnnt2   | 4,5,6  | 11,12,30  | gccgaggaggtggtggaggagta (MSS4288)             | gtctcagcctcacctcaggctca (MSS4289)             |
| Ryr2    | 4,5    | 21,15     | cggacctgtctatctgcactttgt (MSS4284)            | cataccactgtaggaatggcgtagca (MSS4285)          |
| Sorbs1  | 25     | 168       | ccagctgattactggagtcacagaag (MSS2939)          | gttcaccttcataccagttctgtcaatc (MSS2941)        |
| Tmem63b | 4      | 39        | ctggctcggacttcattgtcttc (MSS2981)             | gagacggaggtgagacgcatacc (MSS2982)             |
| Spag9   | 31     | 39        | ggactggaaatggtgtcattatctccat (MSS4303)        | gggactgccacaagaatttcacag (MSS4304)            |
| Mbn1    | 7      | 54        | ggctgccaataaccaggtcaac (MSS4350)              | gggagaaatgctgtatgctgctgtaa (MSS4351)          |
| Afhgef7 | 16     | 225       | gcagacgaaggtcacatctgtgagc (MSS2983)           | cacagcgaactcctcctccgaag (MSS2984)             |
| Mbn2    | 6      | 54        | tcacctcctgcacactgcag (MSS3950)                | ctctttgtaagggatgaagacc (MSS4021)              |
| Mbn1    | 9      | 95        | tattgtcatgacaccgctacaagt (MSS4622)            | tgtgacgacagctcatctgggtaa (MSS4623)            |
| Mbn2    | 8      | 95        | cgcttgcactaccagcaggctc (MSS3951)              | gacatagcagaactagccttagggttgtg (MSS3953)       |
| Csda    | 6      | 207       | atggagttcctgtagaaggagtcgctat (MSS4733)        | aacctcggcggttaagtcggat (MSS4734)              |
| Abi2    | 7      | 183       | gcagtgagggaagtcaccaagtgt (MSS4636)            | gaaggcttgtttgacgttatgaa (MSS4667)             |
| Lnp     | 13     | 83        | gctcaactgtccacgctactagaa (MSS4713)            | cttgcttgtctgctgttaactgtatt (MSS4714)          |
| Asph    | 14     | 48        | catcgagaacctcaaatgaca (MSS4604)               | tggtcatcatagtctgtgtcttacttc (MSS4605)         |
| Chfr    | 3a     | 73        | gtcctatggagctacacggggaaga (MSS4609)           | gtgtctccaggtcaccctaccagat (MSS4601)           |
| Nasp    | 5      | 81        | ctgggattaggacagaacatctggtgat (MSS4606)        | cttetaaggcattccaacactccatt (MSS4607)          |
|         |        |           |                                               |                                               |
| Gene    | Method |           | Forward primer (name)                         | Reverse primer (name)                         |
| Mbn1    | G      |           | ctacgatggctgctcaatatgcctcactgtaag (MSS1382)   |                                               |
| Mbn1    | G      |           |                                               | gggttgaatctcgttagggacactgggtgctgtaa (MSS1383) |
| Mbn1    | G      |           |                                               | cgtagcagacccttgacaccgaatttc (MSS1901)         |
| Mbn2    | G      |           | gtaccaccttctgtgatactgaaagctctgaggtc (MSS4254) |                                               |
| Mbn2    | G      |           | gtaggcctctcaaggagagcactgcattgagc (MSS4255)    |                                               |
| Mbn2    | G      |           |                                               | aatgtcaaccagaccagaatacaccacatg (MSS4256)      |
| Mbn2    | G      |           | cgcttctatcgcttctgacgagttctctgag (MSS3365)     |                                               |
| Cre     | G      |           | tccaacgagtgatgaggttcgaagaacctg (MSS2684)      |                                               |
| Cre     | G      |           |                                               | gaacgaacctggtcgaatcagtcgttcg (MSS4412)        |
| Mbn2    | q      |           | gagtaattgcctctgttattccctcaa (MSS4595)         |                                               |
| Mbn2    | q      |           |                                               | ggagcggcgttctggaacata (MSS4596)               |
| Gapdh   | q      |           | ggtgaaggtcgggtgtaacg (MSS4178)                |                                               |
| Gapdh   | q      |           |                                               | ctcgctcctggaagatggtg (MSS4179)                |

Abbreviations: nucleotides, nt; G, genotyping; q, qPCR
